# Supplementary material for: Exploring Alternative Pathways to Target Bacterial Type II Topoisomerases Using NBTI Antibacterials: Beyond Halogen-Bonding Interactions
Source: MDPI journal article supplement (doi:10.3390/antibiotics12050930), 2023-05-18

## Supporting Information

### Exploring alternative pathways to target the bacterial type II topoisomerases by NBTI antibacterials: beyond the halogen-bonding interactions

Maja Kokot <sup>1,2</sup>, Doroteja Novak <sup>2</sup>, Irena Zdovc <sup>3</sup>, Marko Anderluh <sup>2</sup>, Martina Hrast <sup>2,\*</sup>, Nikola Minovski <sup>1,\*</sup>

\*Corresponding authors: Tel. +386 1 4769 674 e-mail: [martina.hrast@ffa.uni-lj.si](mailto:martina.hrast@ffa.uni-lj.si), Tel. +386 1 4760 383, e-mail: [nikola.minovski@ki.si](mailto:nikola.minovski@ki.si)

<sup>1</sup> Theory Department, Laboratory for Cheminformatics, National Institute of Chemistry, Hajdrihova 19, 1001 Ljubljana, Slovenia

<sup>2</sup> Department of Pharmaceutical Chemistry, Faculty of Pharmacy, University of Ljubljana, Aškerčeva cesta 7, 1000 Ljubljana, Slovenia

<sup>3</sup> Institute of Microbiology and Parasitology, Veterinary Faculty, University of Ljubljana, Gerbičeva 60, 1000 Ljubljana, Slovenia

## Docking parameters

**Table S1.** Settings and parameters of the GOLD genetic algorithm

| Setting/parameter    | Value  |
|----------------------|--------|
| Population size      | 100    |
| Selection pressure   | 1.1    |
| Number of operations | 100,00 |
| Number of islands    | 5      |
| Niche size           | 2      |
| Migrate              | 10     |
| Mutate               | 95     |
| Cross-over           | 95     |

## Re-docking validation

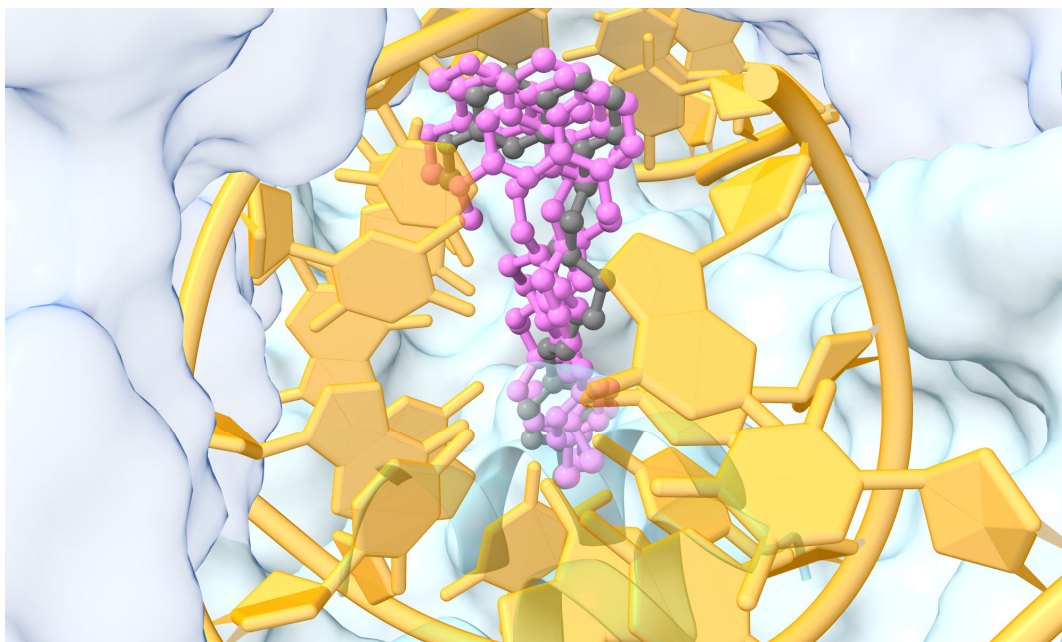

**Figure S1.** Structural comparison between co-crystallized AMK-12 conformation and its calculated docked poses in the crystal structure of *S. aureus* DNA gyrase (PDB ID: 6Z1A). The co-crystallized ligand AMK-12 is represented in grey, while its re-docked poses in violet.

**Table S2.** Re-docking validation data

| Protein<br>Co-crystallized ligand<br>(PDB ID)   | RMDS (Å)      |               |               |
|-------------------------------------------------|---------------|---------------|---------------|
|                                                 | Docked pose 1 | Docked pose 2 | Docked pose 3 |
| <i>S. aureus</i> DNA gyrase<br>AMK-12<br>(6Z1A) | 0.832         | 1.750         | 1.304         |

Heavy-atoms root-mean-square deviation (RMSD) values in Ångstrom units (Å) calculated between each AMK-12 re-docked pose and the co-crystallized AMK-12 conformation within *S. aureus* DNA gyrase.

### Antimicrobial activity of the NBTIs in $\mu\text{M}$ .

**Table S3.** Antimicrobial activity of the NBTIs against different Gram-positive and Gram-negative bacteria.

| Cmpd                            | MIC ( $\mu\text{M}$ ) |      |       |       |      |      |      |       | Gepo  |
|---------------------------------|-----------------------|------|-------|-------|------|------|------|-------|-------|
|                                 | 5                     | 6    | 7     | 8     | 9    | 10   | 11   | 12    |       |
| <i>S. aureus</i> (ATCC 29213)   | 0.082                 | 2.56 | 1.28  | 0.161 | 164  | >328 | >328 | 0.082 | 0.320 |
| MRSA (QA-11.7) <sup>1</sup>     | 0.041                 | 2.56 | 2.56  | 0.320 | ND   | ND   | ND   | 0.161 | 0.161 |
| MRSA(QA-12.1) <sup>2</sup>      | 0.041                 | 5.12 | 1.28  | 0.161 | ND   | ND   | ND   | 0.082 | 0.320 |
| MRSA (QA-11.2)                  | 0.082                 | 1.28 | 0.640 | 0.082 | ND   | ND   | ND   | 0.161 | 1.28  |
| <i>E. coli</i> (ATCC 25922)     | 5.12                  | >328 | >328  | 20.5  | >328 | >328 | >328 | 10.2  | 2.56  |
| <i>E. coli</i> D22 <sup>3</sup> | 2.56                  | 81.9 | 81.9  | 2.56  | >328 | >328 | >328 | 0.640 | 0.320 |
| <i>E. coli</i> N43 <sup>4</sup> | 0.320                 | 10.2 | 10.2  | 2.56  | 164  | >328 | >328 | 0.161 | 0.041 |
| <i>E. coli</i> ESBP QA:11.3     | 10.2                  | >328 | >328  | 20.5  | >328 | >328 | >328 | 10.2  | ND    |
| <i>K. pneumoniae</i>            | 41.0                  | >328 | >328  | 41.0  | >328 | >328 | >328 | 41.0  | 20.5  |
| <i>P. aeruginosa</i> RDK 184    | >328                  | >328 | >328  | 328   | >328 | >328 | >328 | >328  | 20.5  |
| <i>E. faecalis</i> DRK 057      | 0.320                 | 20.5 | 10.2  | 0.640 | >328 | >328 | >328 | 1.28  | 5.12  |
| VRE                             | 0.082                 | 5.12 | 5.12  | 0.320 | ND   | ND   | ND   | 0.640 | 2.56  |
| <i>A. baumannii</i>             | 2.56                  | 164  | 164   | 5.12  | >328 | >328 | >328 | 5.12  | 20.5  |

<sup>1</sup> Resistant to cefoxitin, ciprofloxacin, clindamycin, erythromycin, tetracycline, thiamulin, trimethoprim. <sup>2</sup> Resistant to cefoxitin, gentamicin, kanamycin, rifampicin, streptomycin, sulfamethoxazole, tetracycline. <sup>3</sup> With a mutation in the *lpxC* gene that increases membrane permeability. <sup>4</sup> With *AcrA* knock-out (cell membrane efflux pump). ATCC, American Type Culture Collection; QA, Quality Assurance; Gepo: gepotidacin.

## NMR spectra

### 1-(2-(6-methoxy-1,5-naphthyridin-4-yl)ethyl)-N-(4-methylbenzyl)piperidin-4-amine (5)

$^1\text{H}$  NMR (400 MHz,  $\text{CDCl}_3$ )

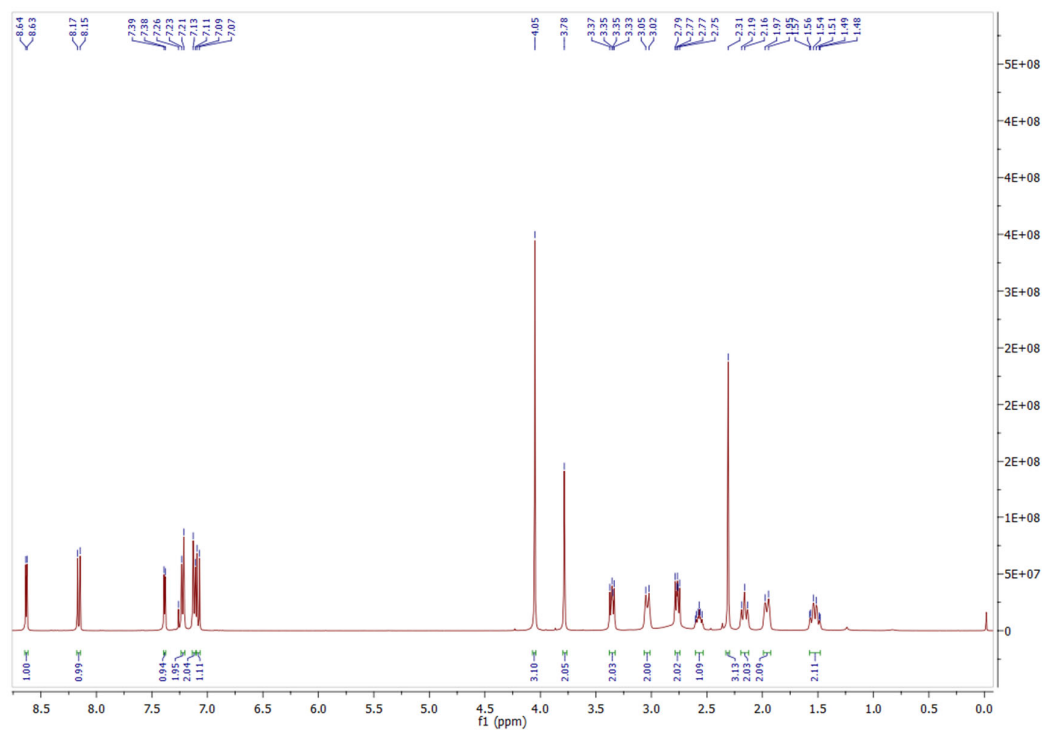

$^{13}\text{C}$  NMR (100 MHz,  $\text{CDCl}_3$ )

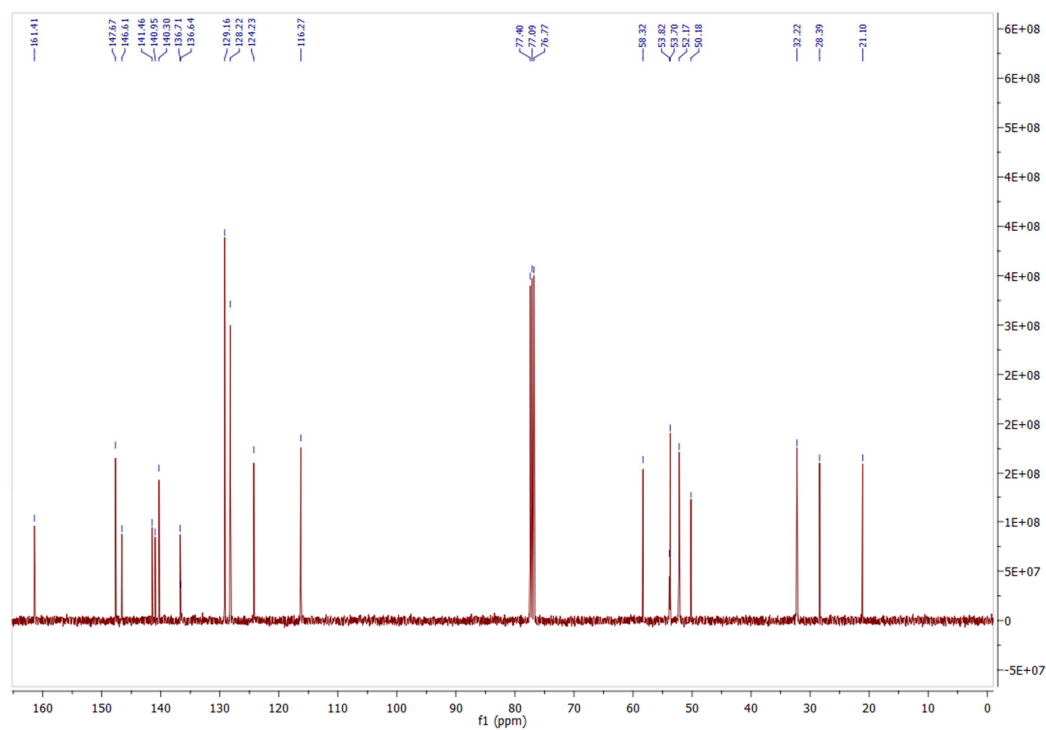

**(4-(((6-methoxy-1,5-naphthyridin-4-yl)oxy)methyl)-N-(4-methylbenzyl)cyclohexan-1-amine (6)**

$^1\text{H}$  NMR (400 MHz,  $\text{CDCl}_3$ )

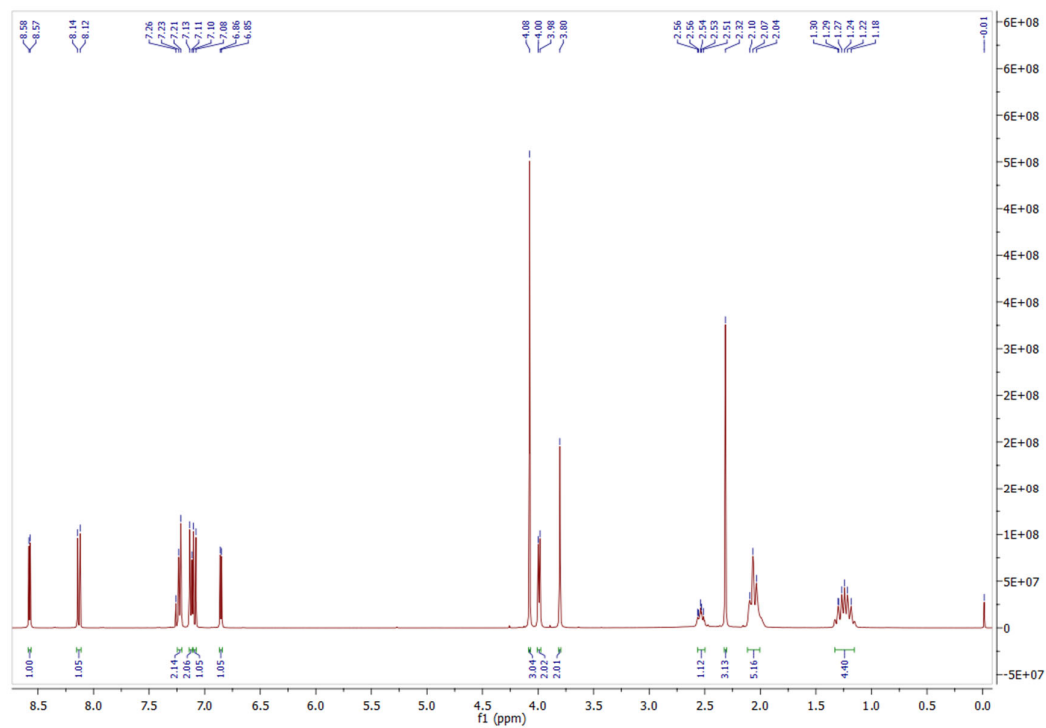

$^{13}\text{C}$  NMR (100 MHz,  $\text{CDCl}_3$ )

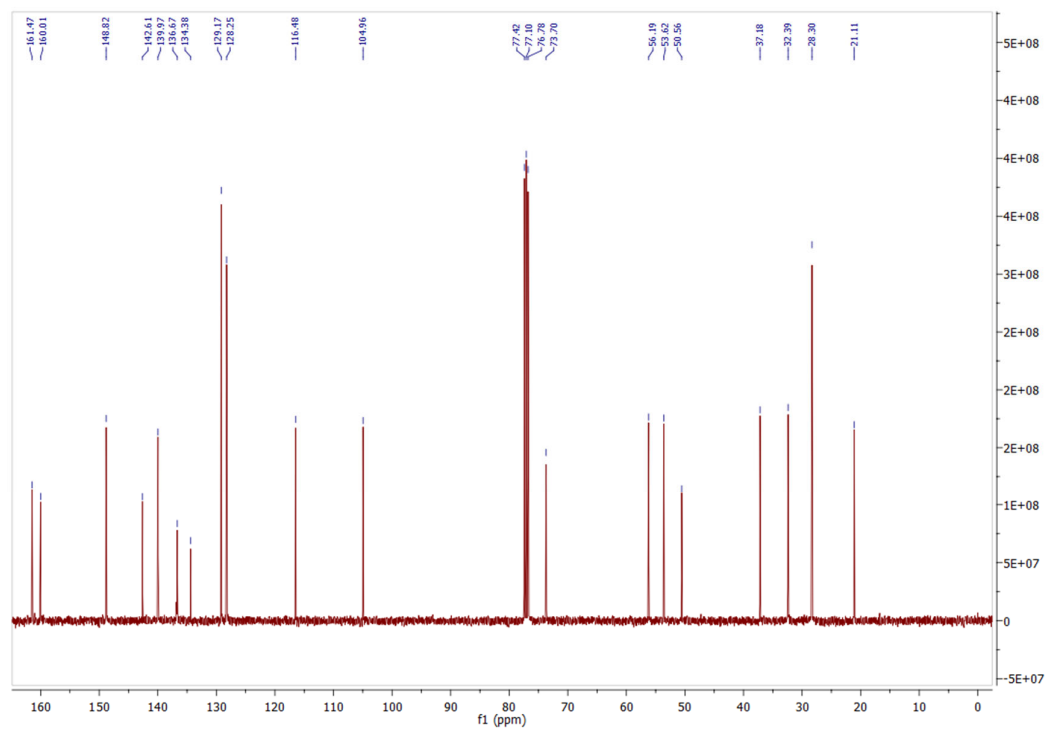

**6-(((6-methoxy-1,5-naphthyridin-4-yl)oxy)methyl)-N-(4-methylbenzyl)tetrahydro-2H-pyran-3-amine (7)**

$^1\text{H}$  NMR (400 MHz,  $\text{DMSO}-d_6$ )

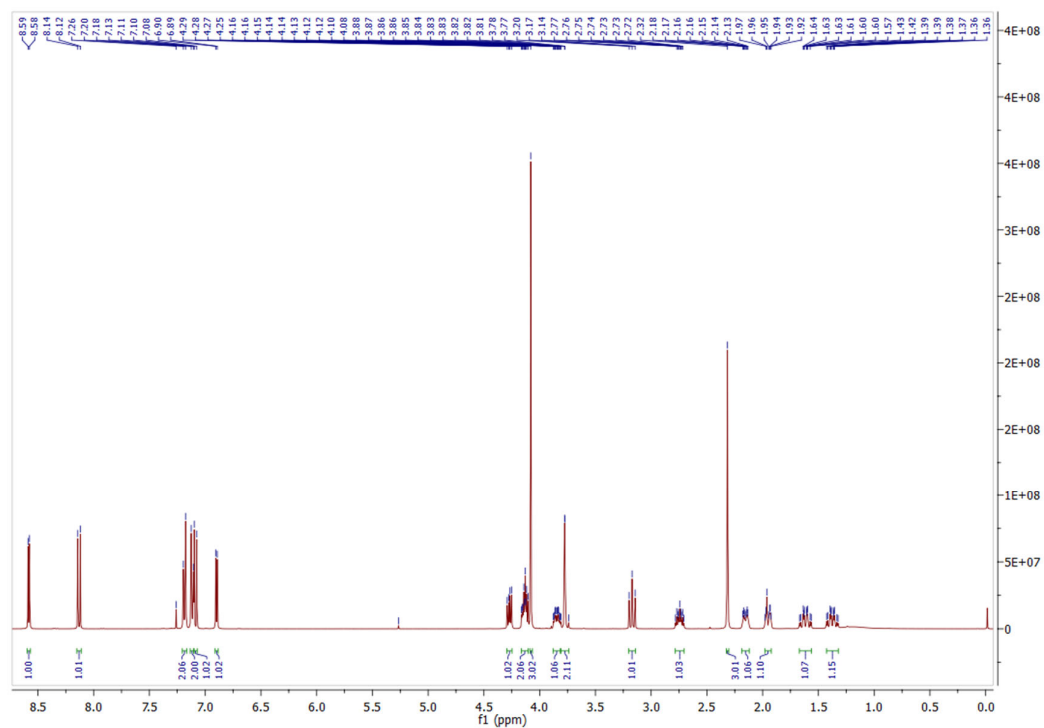

$^{13}\text{C}$  NMR (100 MHz,  $\text{DMSO}-d_6$ )

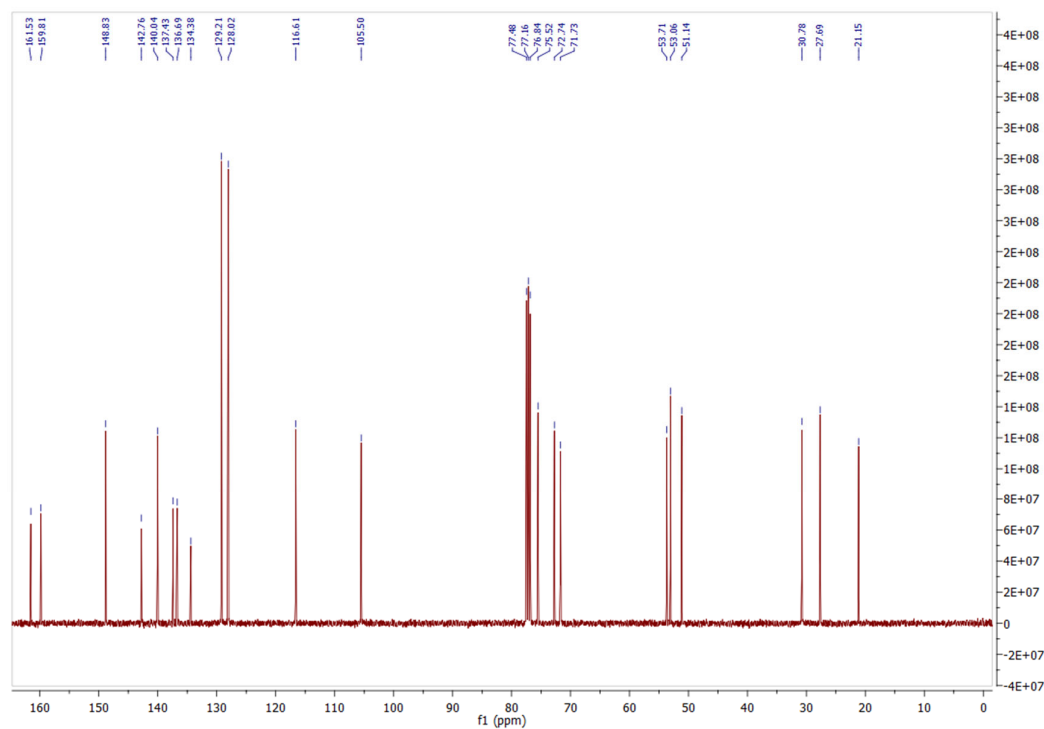

**1-(6-methoxy-1,5-naphthyridin-4-yl)-2-((4-methylbenzyl)amino)cyclohexyl)ethan-1-ol (8)**

$^1\text{H}$  NMR (400 MHz,  $\text{CDCl}_3$ )

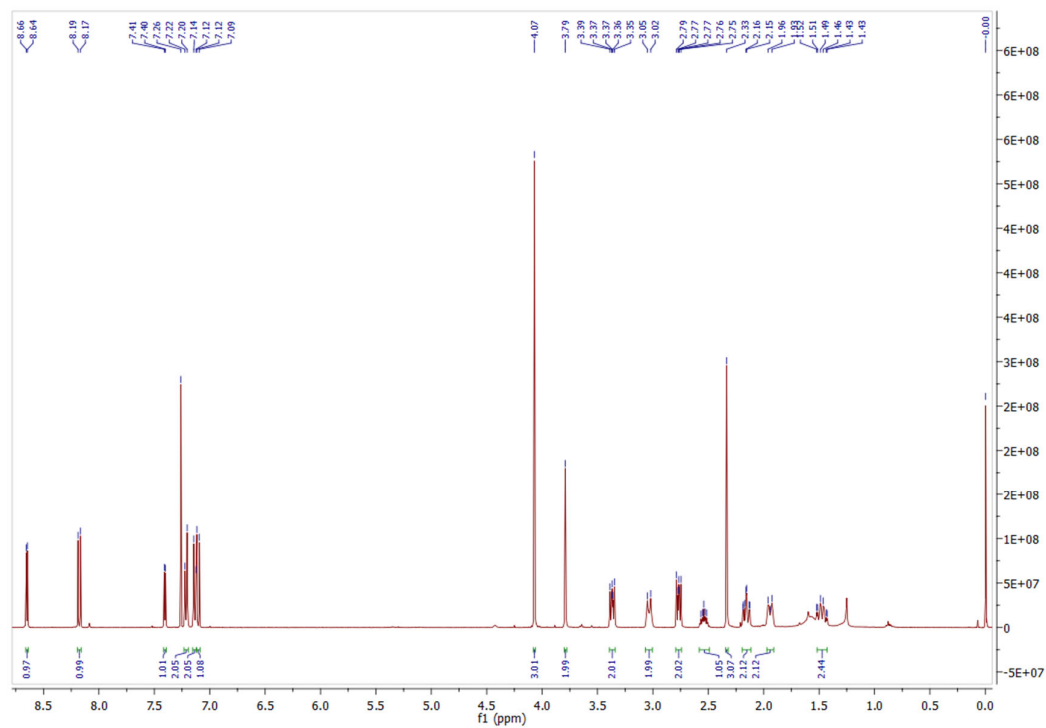

$^{13}\text{C}$  NMR (100 MHz,  $\text{CDCl}_3$ )

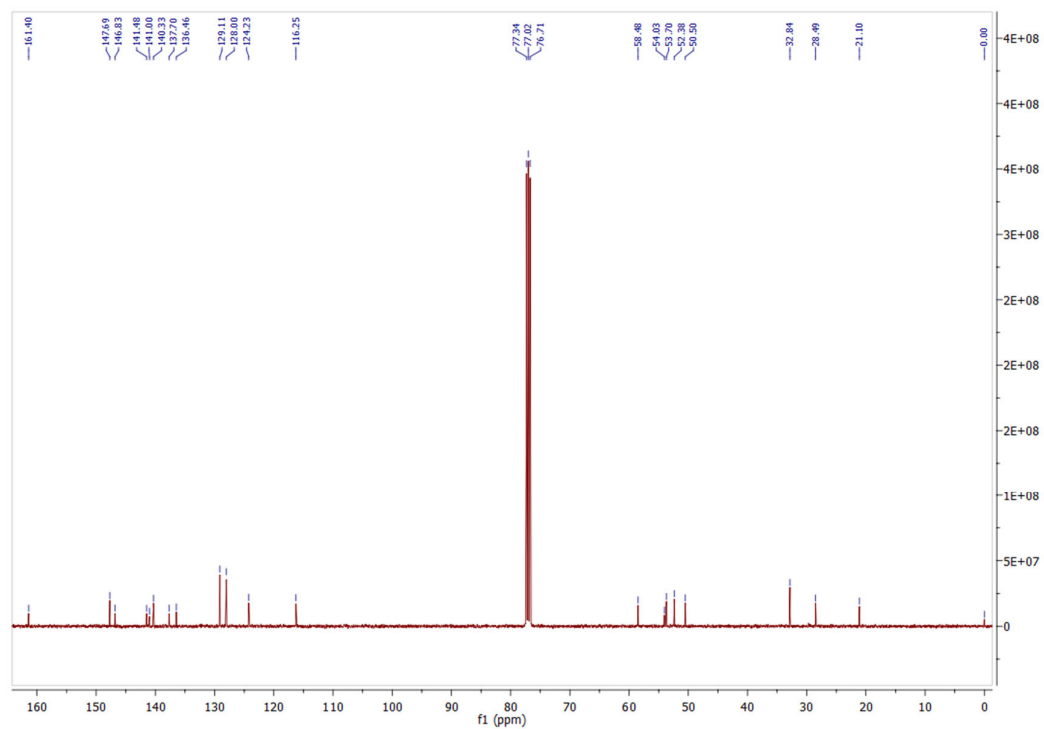

**N-(4-aminobenzyl)-1-(2-(6-methoxy-1,5-naphthyridin-4-yl)ethyl)piperidin-4-amine (9)**

$^1\text{H}$  NMR (400 MHz,  $\text{DMSO}-d_6$ )

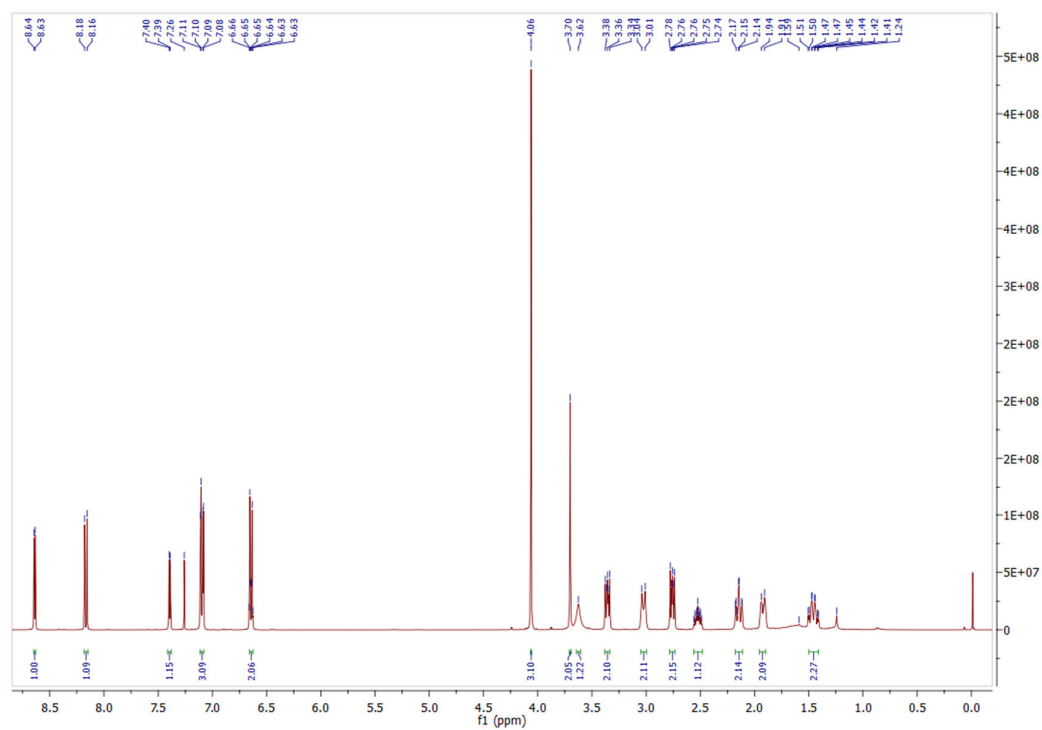

$^{13}\text{C}$  NMR (100 MHz,  $\text{DMSO}-d_6$ )

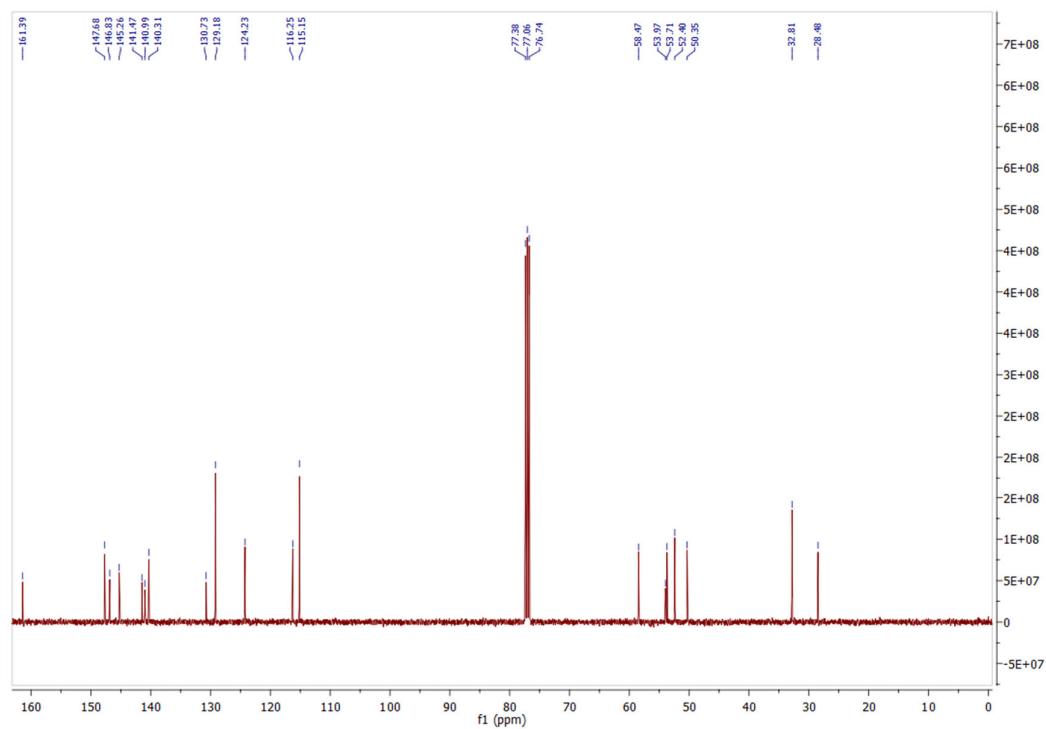



4-(((4-(((6-methoxy-1,5-naphthyridin-4-yl)oxy)methyl)cyclohexyl)amino)methyl)aniline (10)

$^1\text{H}$  NMR (400 MHz,  $\text{DMSO-}d_6$ )

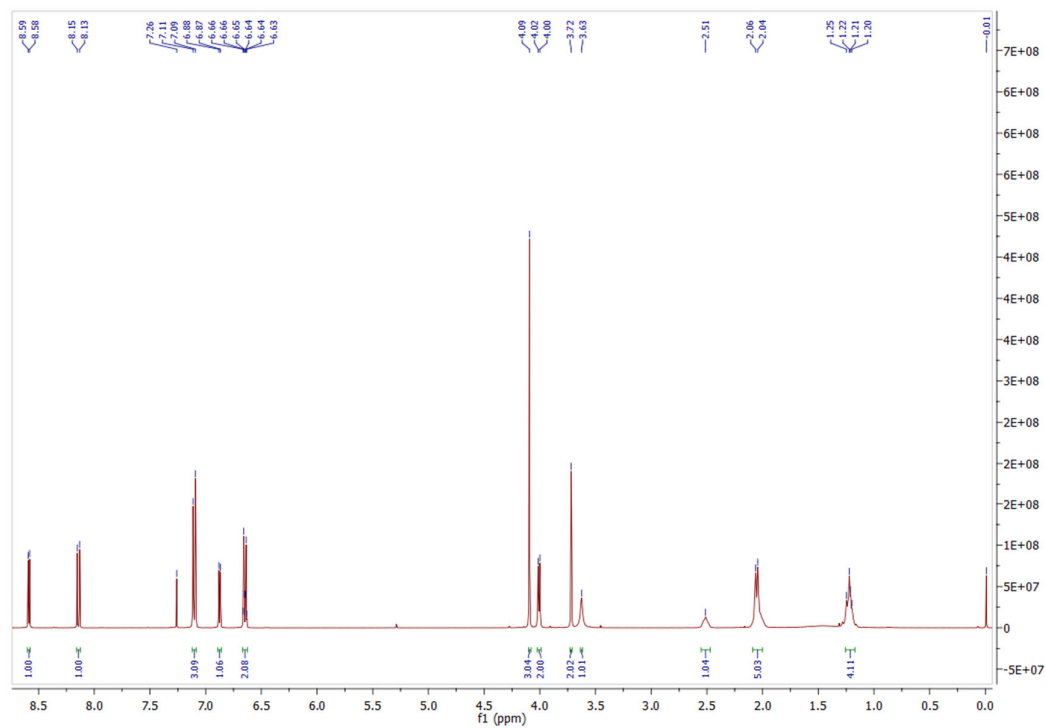

$^{13}\text{C}$  NMR (100 MHz,  $\text{DMSO-}d_6$ )

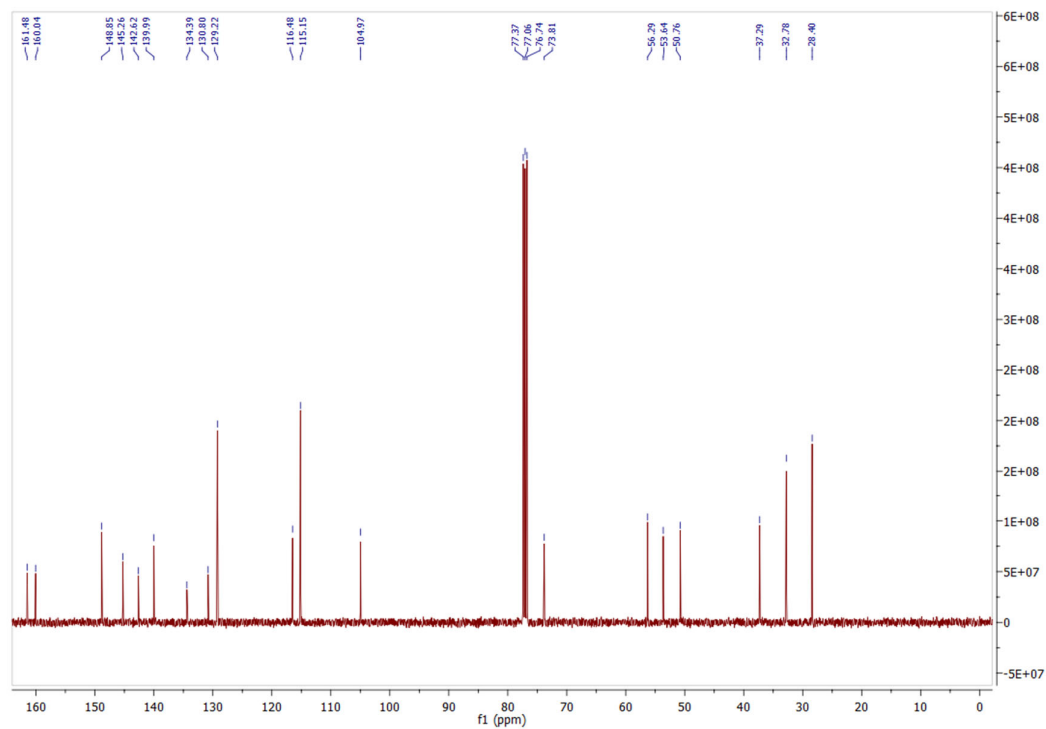

<sup>1</sup>H NMR (400 MHz, DMSO-*d*<sub>6</sub>)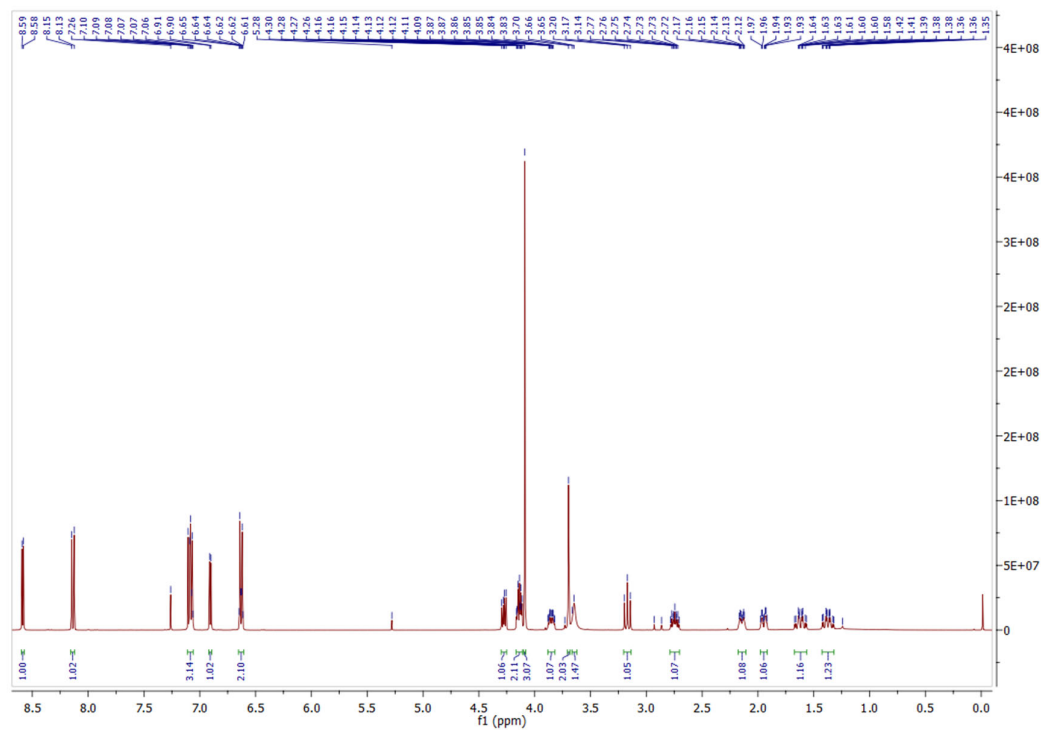 $^{13}\text{C}$  NMR (100 MHz, DMSO- $d_6$ )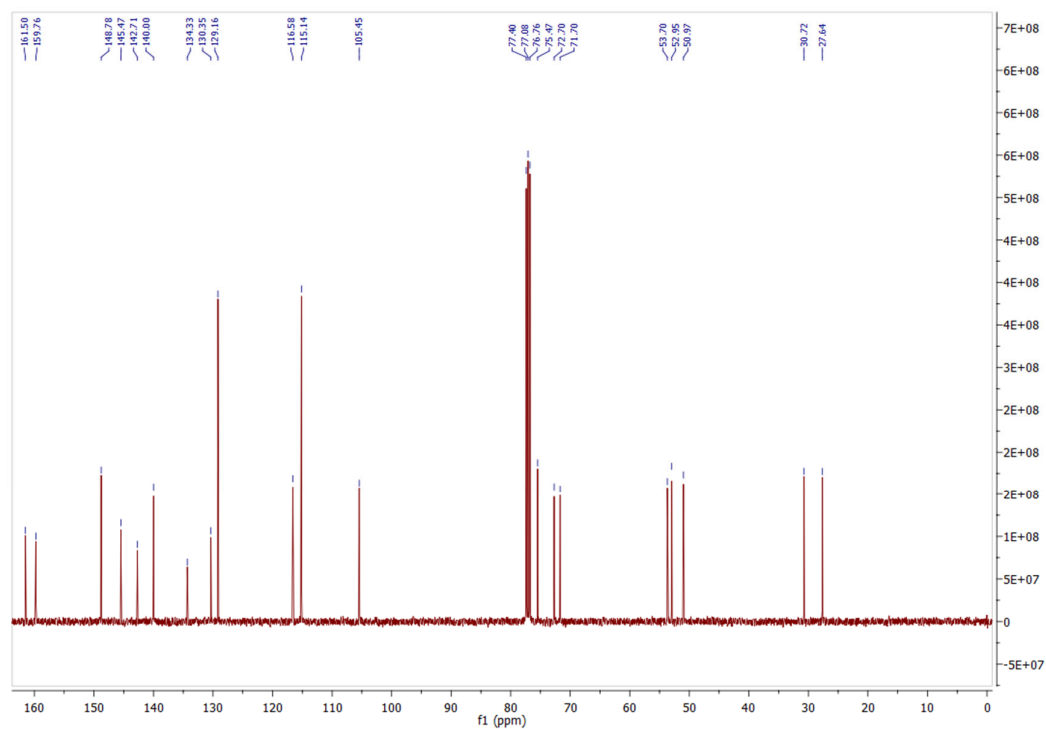

**N-(4-bromo-3-(trifluoromethyl)benzyl)-1-(2-(6-methoxy-1,5-naphthyridin-4-yl)ethyl)piperidin-4-amine (12)**

$^1\text{H}$  NMR (400 MHz,  $\text{DMSO}-d_6$ )

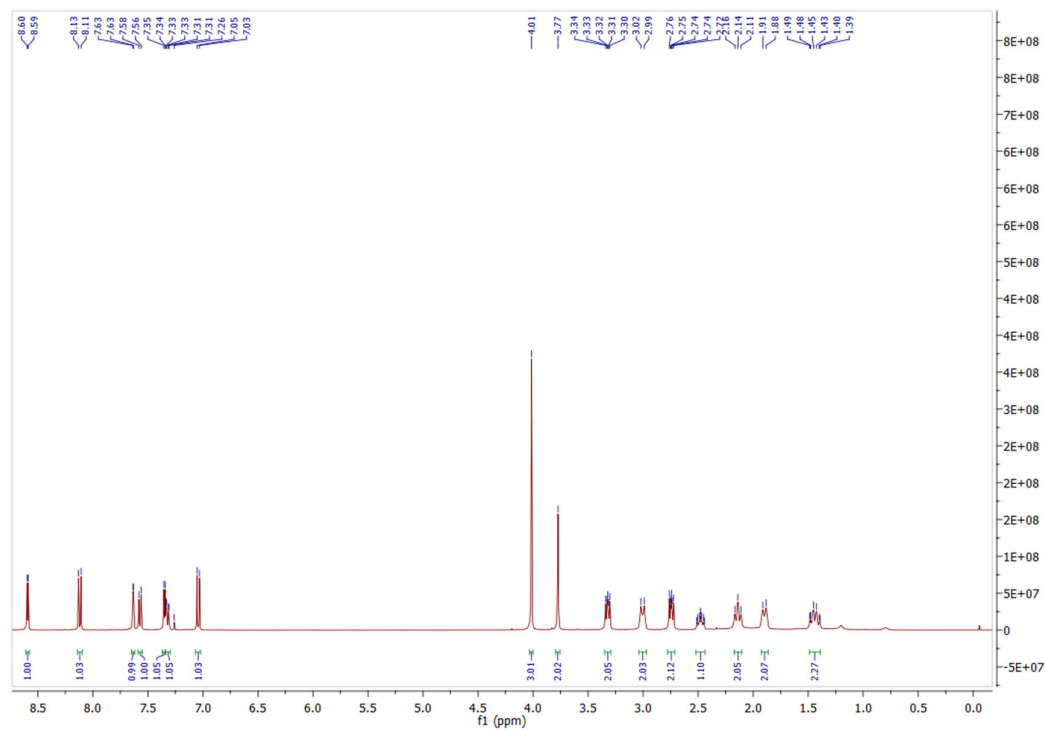

$^{13}\text{C}$  NMR (100 MHz,  $\text{DMSO}-d_6$ )

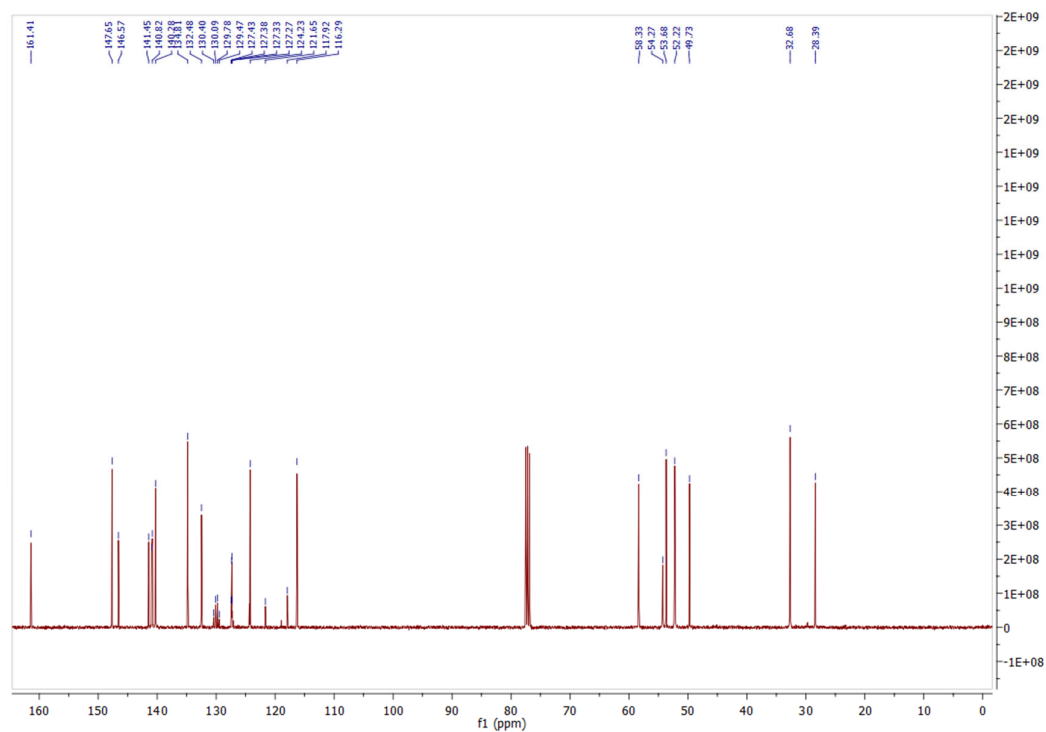

## HPLC traces

HPLC chromatogram of hit compound 5 at 254 nm.

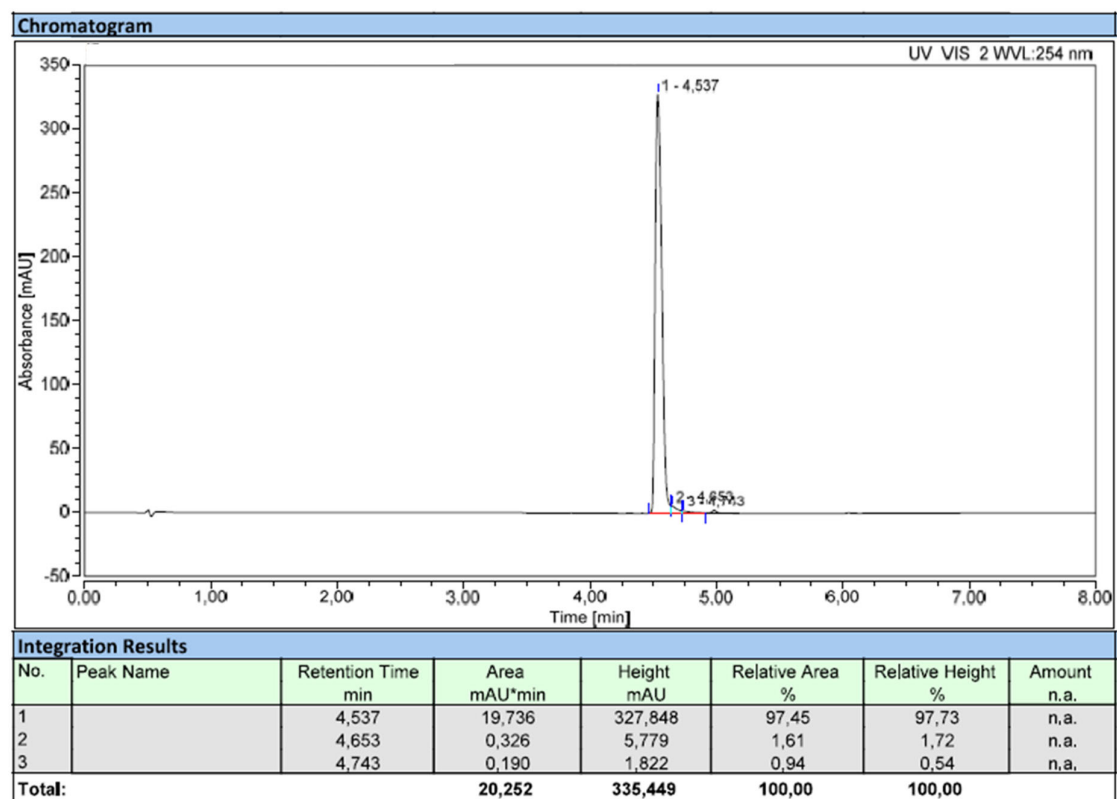

HPLC chromatogram of hit compound 6 at 254 nm.

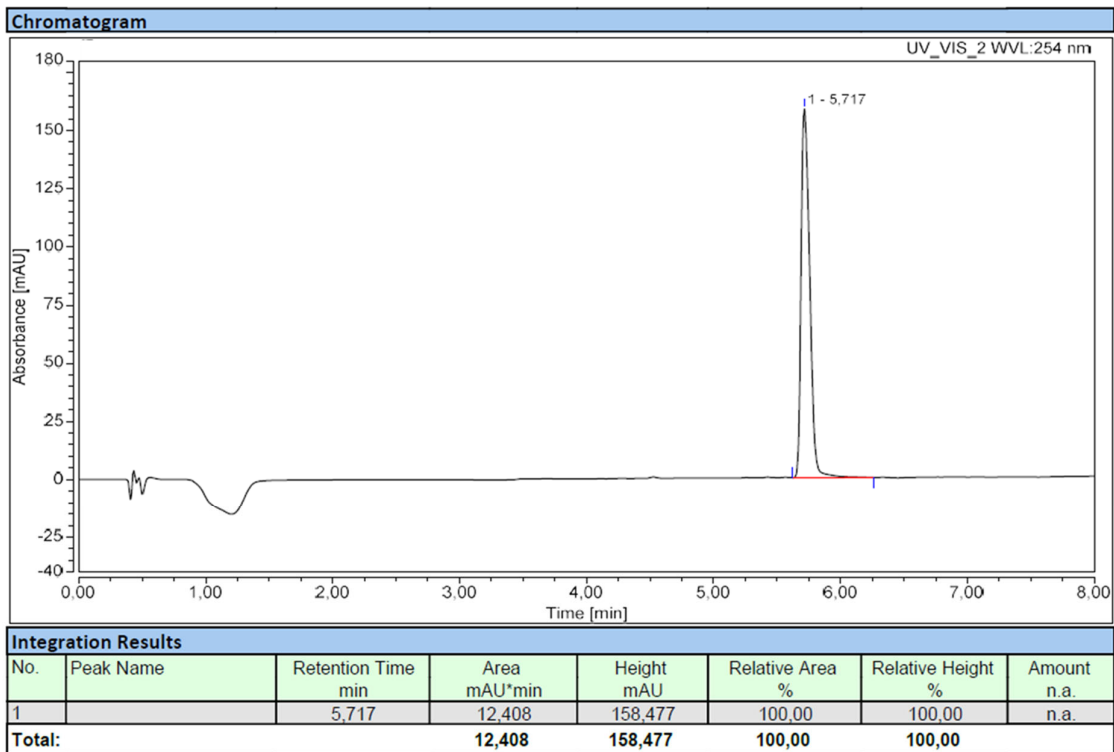

HPLC chromatogram of hit compound 7 at 254 nm.

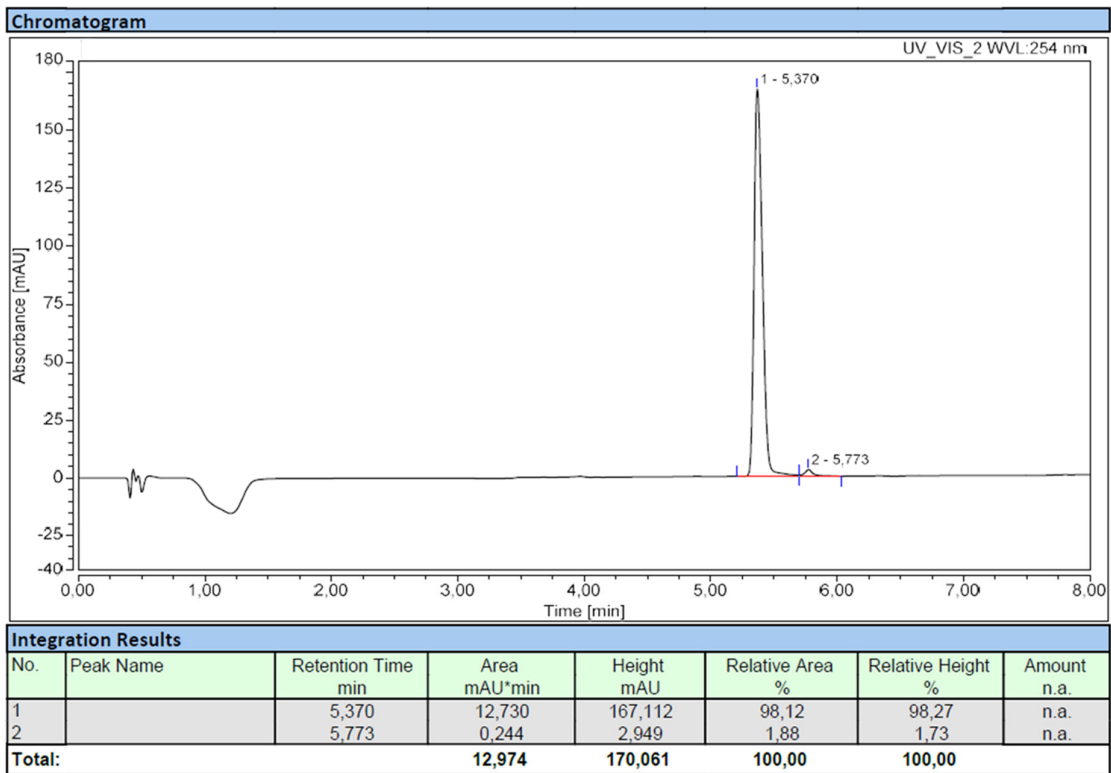

HPLC chromatogram of hit compound 8 at 254 nm.

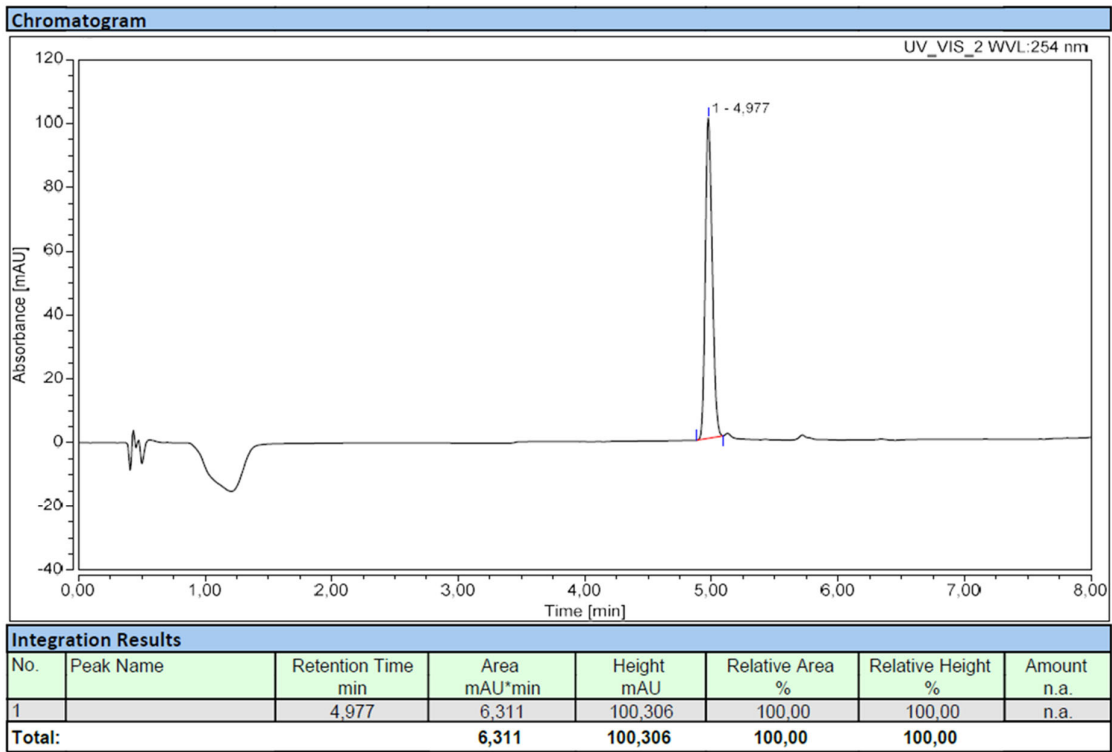

HPLC chromatogram of hit compound 9 at 254 nm.

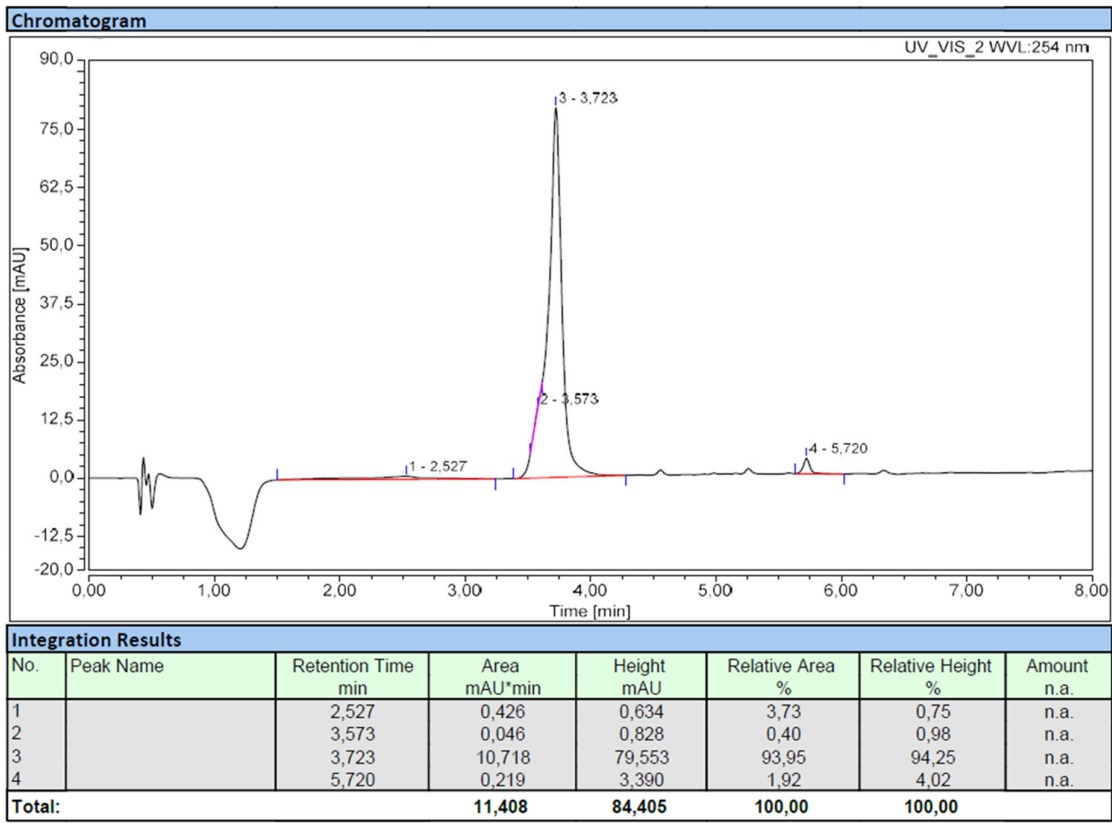



HPLC chromatogram of hit compound 10 at 254 nm.

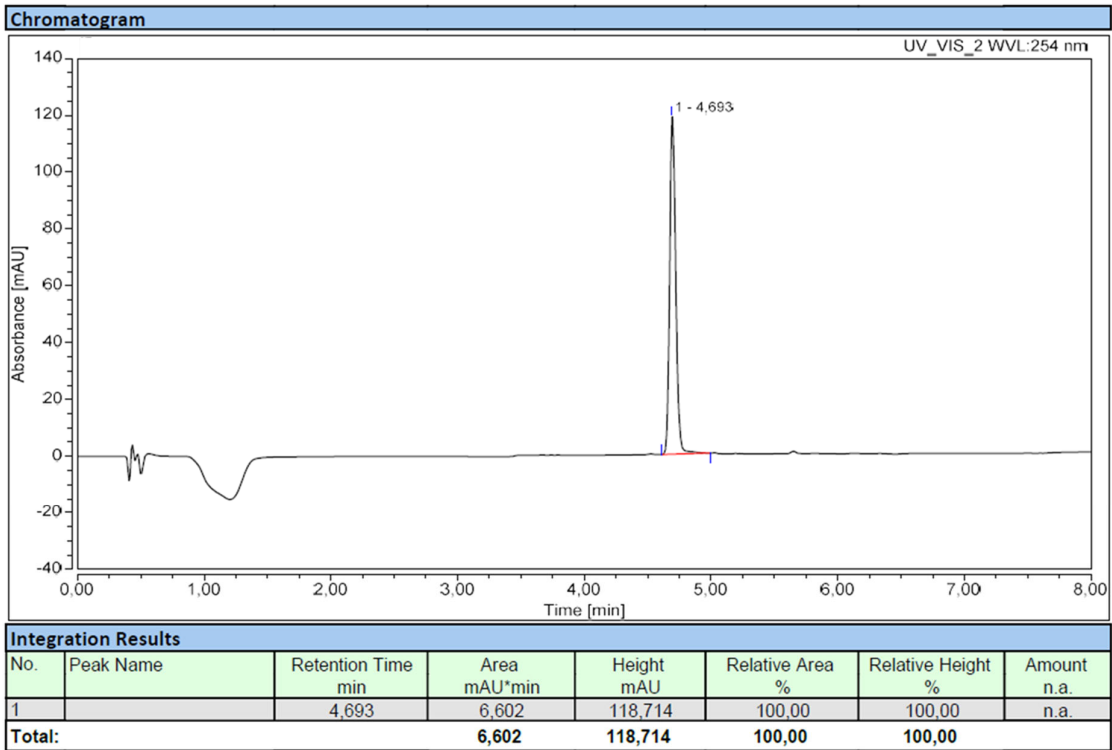

HPLC chromatogram of hit compound 11 at 254 nm.

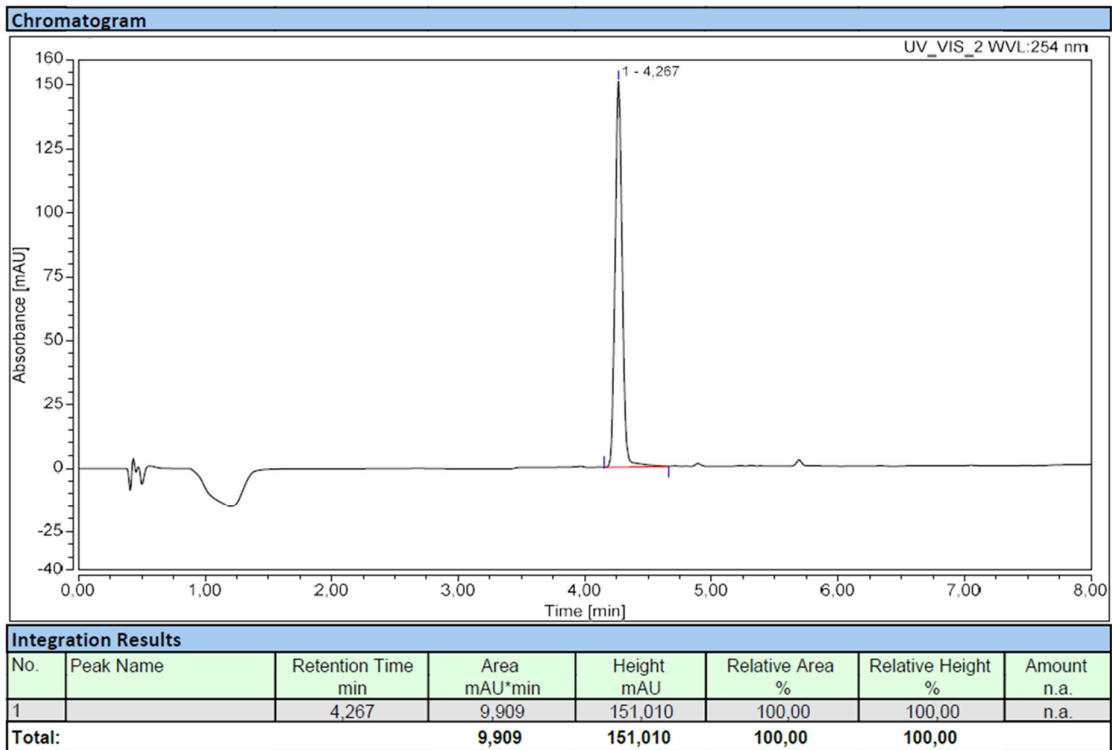

HPLC chromatogram of hit compound 12 at 254 nm.

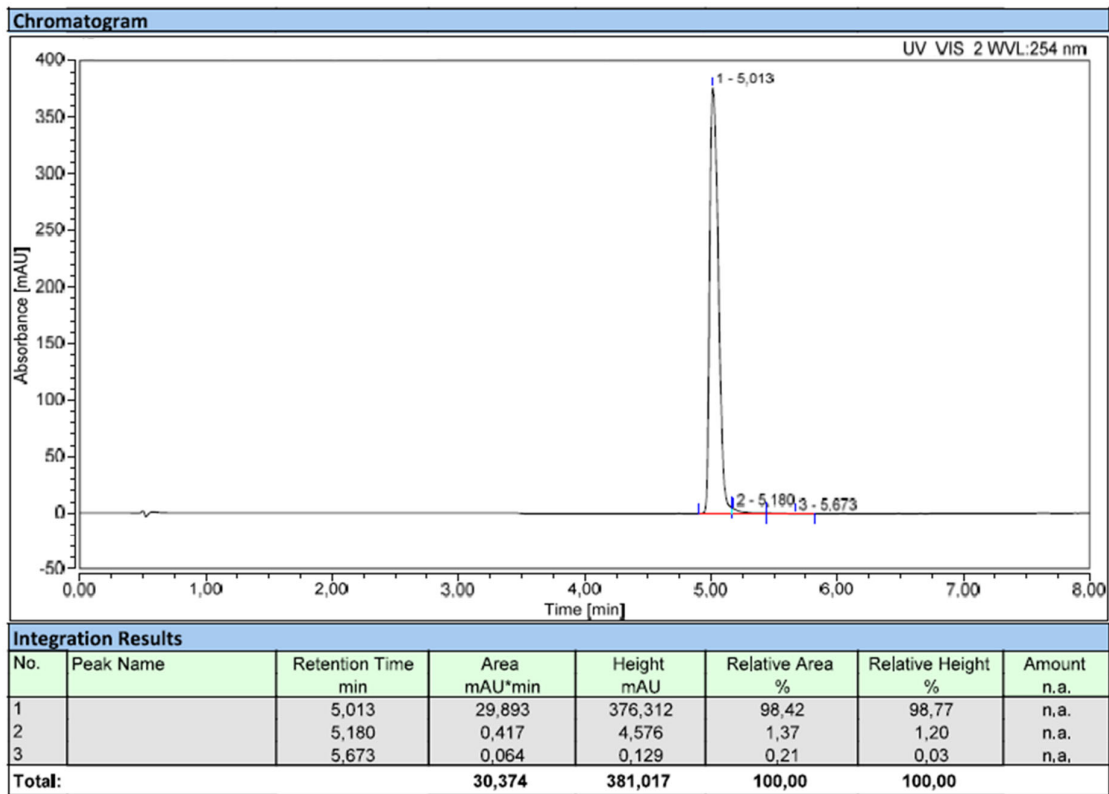

## HRMS spectra

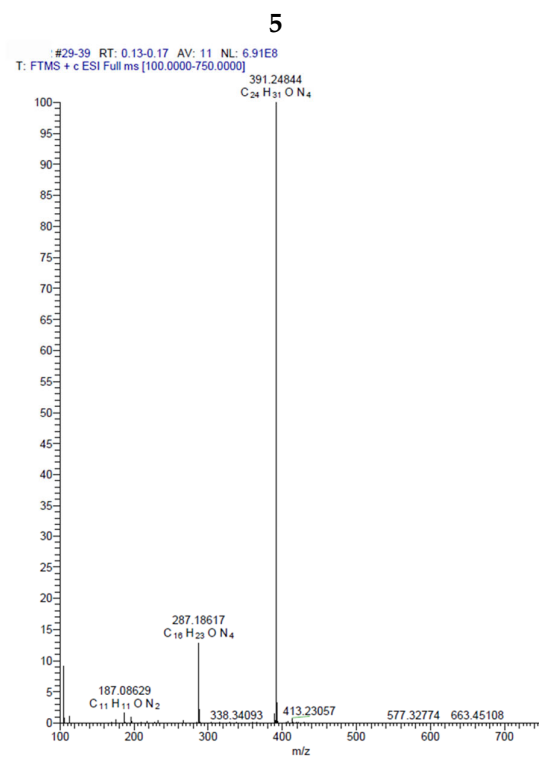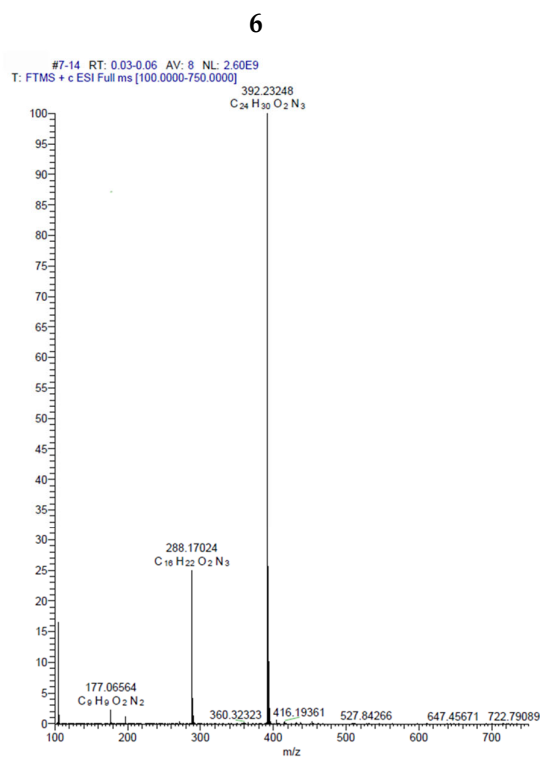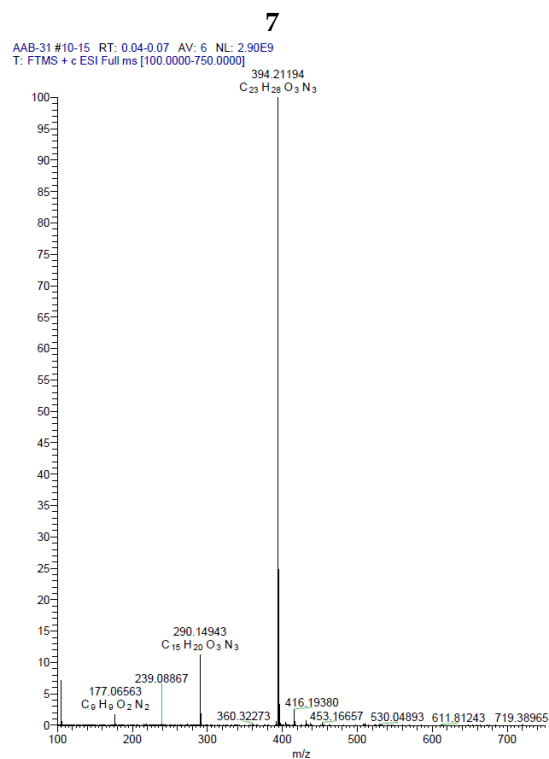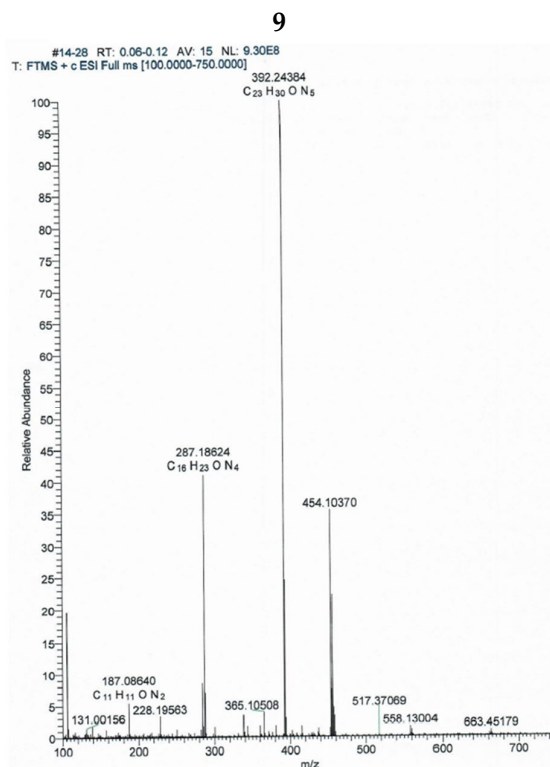

10

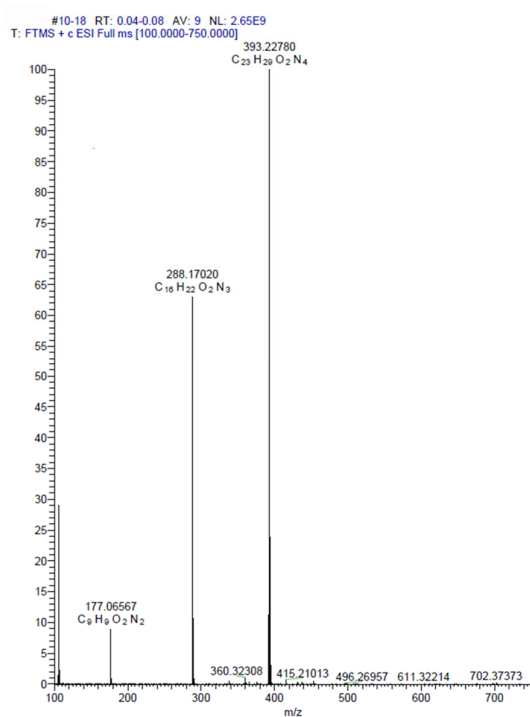

11

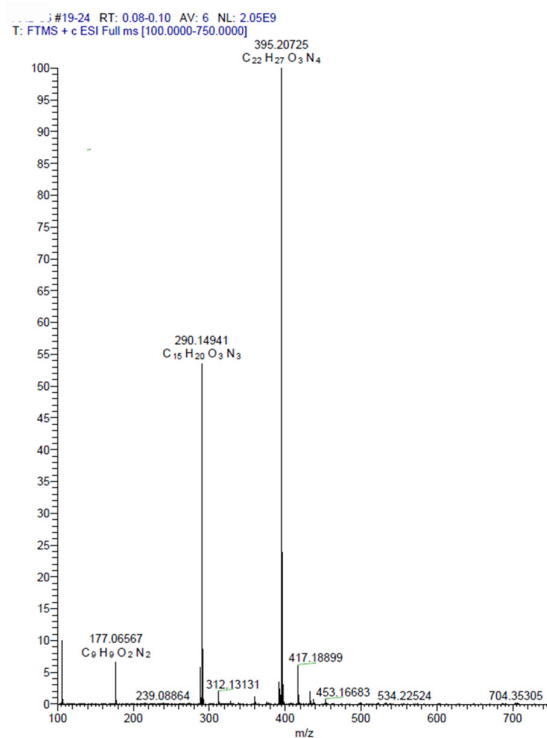

12

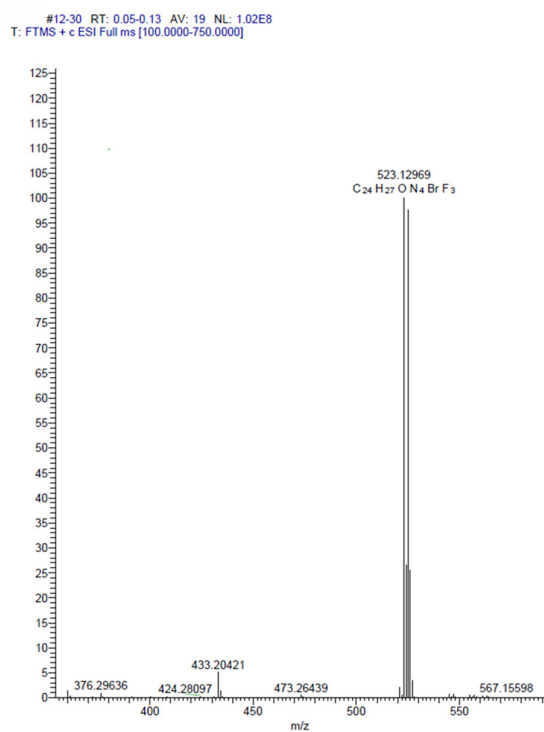

Supplement: s1 [file s1]
